# Supplementary material for: Modulation of Aptamer–Ligand-Binding by Complementary Oligonucleotides: A G-Quadruplex Anti-Ochratoxin A Aptamer Case Study
Source: Int J Mol Sci. 2022 Apr 28;23(9):4876. doi: 10.3390/ijms23094876 (PMC9103105; doi:10.3390/ijms23094876)
Supplement: Supplementary file 1 [file ijms-23-04876-s001.zip › ijms-1678668-supplementary.pdf]

## SUPPORTING INFORMATION

### **Modulation of Aptamer-Ligand-Binding by Complementary Oligonucleotides: a G-Quadruplex Anti-Ochratoxin A Aptamer Case Study**

Alexey V. Samokhvalov<sup>1</sup>, Irina V. Safenkova<sup>1</sup>, Sergei A. Eremin<sup>1,2</sup>, Artem N. Bonchuk<sup>3</sup> Oksana G. Maksimenko<sup>3</sup>, Nikolai N. Sluchanko<sup>1</sup>, Anatoly V. Zherdev<sup>1</sup>, Boris B. Dzantiev<sup>1\*</sup>

<sup>1</sup>A.N. Bach Institute of Biochemistry, Research Center of Biotechnology, Russian Academy of Sciences, Moscow 119071, Russia

<sup>2</sup>Faculty of Chemistry, M.V. Lomonosov Moscow State University, Moscow 119991, Russia

<sup>3</sup>Center for Precision Genome Editing and Genetic Technologies for Biomedicine, Institute of Gene Biology, Russian Academy of Sciences, Moscow 119334, Russia

\*Correspondence: [dzantiev@inbi.ras.ru](mailto:dzantiev@inbi.ras.ru); Tel.: +7-495-954-3142; Fax: +7-495-954-2804

### S1 Measurements of interaction of aptamer and its shortened variants with labeled ligand (OTA-Flu) by fluorescence anisotropy.

To verify previous data considering influence of aptamer tail regions on OTA binding [16,19] we carry out fluorescent anisotropy measurement of interaction between 4'-aminomethyl fluorescein labeled OTA and aptamer or its shortened variants as mentioned in Section 2.4 of Materials and Methods, see Table s1.

**Table S1** Sequences of aptamer and its shortened variants

| Name           | Sequence from 5' to 3'                          |
|----------------|-------------------------------------------------|
| Aptamer 1.12.2 | gat cgg gtg tgg gtg gcg taa agg gag cat cgg aca |
| Mut1           | _at cgg gtg tgg gtg gcg taa agg gag cat cgg aca |
| Mut2           | gat cgg gtg tgg gtg gcg taa agg gag cat cgg     |
| Mut3           | gat cgg gtg tgg gtg gcg taa agg gag ca          |
| Mut4           | gat cgg gtg tgg gtg gcg taa agg gag c           |
| Mut5           | gat cgg gtg tgg gtg gcg taa agg gag             |

Fluorescent anisotropy measurement demonstrated (Fig. s1) that deletion of nucleotides from 5'-tail (Mut1) and 3'-tail (Mut2 – Mut5) result to increase of dissociation constant of aptamer-OTA interaction. It's consistent with previously published data, see Table s2.

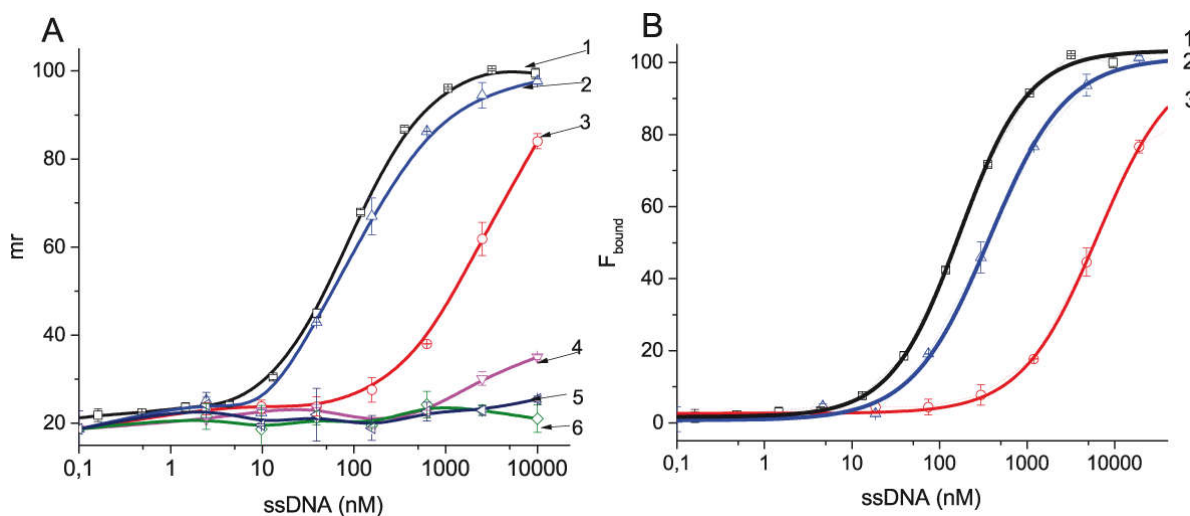

**Figure S1** (A) Dependences of fluorescence anisotropy (mr) and (B) F<sub>bound</sub> of OTA-Flu from aptamer and its shortened variants concentration, where 1 – aptamer, 2 – Mut2; 3 – Mut1; 4 – Mut3, 5 – Mut4; 6 – Mut5

**Table S2.** Analysis of influence of mononucleotide mutation and deletion in aptamer 1.12.2 sequence on its ligand binding properties

| Region                             | No from 5' to 3' | Sequence | K <sub>D</sub> (OTA-Flu), nM | K <sub>D</sub> (OTA)** , nM | K <sub>D</sub> (OTA)*** , nM | K <sub>D</sub> (OTA)*** , nM                 |
|------------------------------------|------------------|----------|------------------------------|-----------------------------|------------------------------|----------------------------------------------|
| 5'-tail                            | 1                | G        | 3300                         |                             | 2070                         | G to C – 900 / G to A - 1160 / G to T - 1470 |
|                                    | 2                | A        |                              |                             | 27220                        |                                              |
|                                    | 3                | T        |                              |                             | NB                           |                                              |
|                                    | 4                | C        |                              |                             |                              |                                              |
|                                    | 5                | G        |                              |                             |                              |                                              |
| <i>G-core guanine</i>              | 6                | G        |                              |                             |                              |                                              |
|                                    | 7                | G        |                              |                             |                              |                                              |
| Core loop                          | 8                | T        |                              |                             |                              |                                              |
|                                    | 9                | G        |                              |                             |                              |                                              |
|                                    | 10               | T        |                              |                             |                              |                                              |
| <i>G-core guanine</i>              | 11               | G        |                              |                             |                              |                                              |
|                                    | 12               | G        |                              |                             |                              |                                              |
| Core loop                          | 13               | G        |                              |                             |                              |                                              |
|                                    | 14               | T        |                              |                             |                              |                                              |
| <i>G-core guanine</i>              | 15               | G        |                              |                             |                              |                                              |
|                                    | 16               | G        |                              |                             |                              |                                              |
| Core loop                          | 17               | C        |                              |                             |                              |                                              |
|                                    | 18               | G        |                              |                             |                              |                                              |
|                                    | 19               | T        |                              |                             |                              |                                              |
|                                    | 20               | A        |                              |                             |                              |                                              |
|                                    | 21               | A        |                              |                             |                              |                                              |
|                                    | 22               | A        |                              |                             |                              |                                              |
| <i>G-core guanine</i>              | 23               | G        |                              |                             |                              | G to C - NB*                                 |
|                                    | 24               | G        |                              |                             |                              | G to C - 30000                               |
| 3'-tail                            | 25               | G        |                              |                             |                              |                                              |
|                                    | 26               | A        |                              | NB*                         |                              |                                              |
|                                    | 27               | G        |                              |                             |                              |                                              |
|                                    | 28               | C        | NB*                          |                             |                              |                                              |
|                                    | 29               | A        | NB*                          | NB*                         |                              |                                              |
|                                    | 30               | T        |                              |                             | 20920                        |                                              |
|                                    | 31               | C        |                              | 1600                        | 423                          |                                              |
|                                    | 32               | G        |                              | 500                         |                              |                                              |
|                                    | 33               | G        |                              | 400                         | 148                          |                                              |
|                                    | 34               | A        |                              |                             |                              |                                              |
|                                    | 35               | C        |                              |                             |                              |                                              |
|                                    | 36               | A        | 192                          | 200                         | 46                           |                                              |
| K <sub>D</sub> with aptamer 1.12.2 |                  |          | 183 nM                       | 200 nM                      | 55 nM                        | 55 nM                                        |

\*NB - no binding

\*\* Data from [16]

\*\*\* Data from [19]

**S2 Characterization of the interaction of the aptamer with complementary ssDNAs by isothermal microcalorimetry**

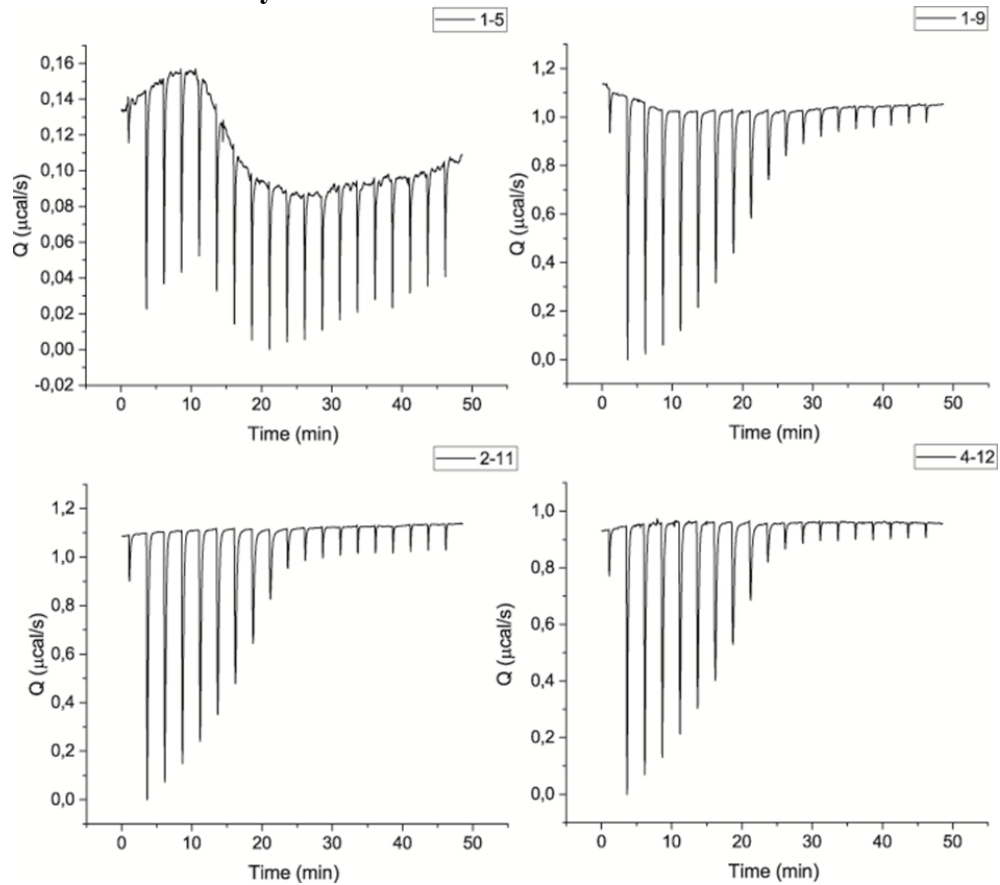

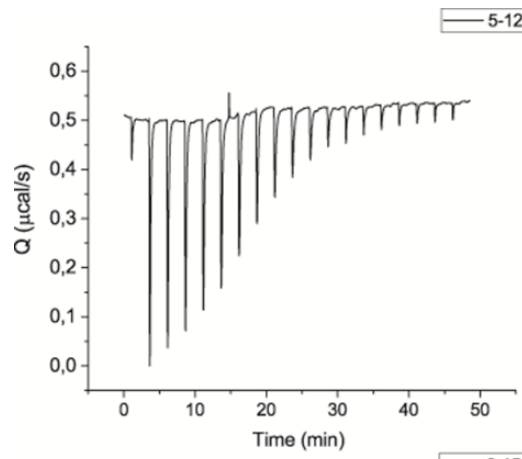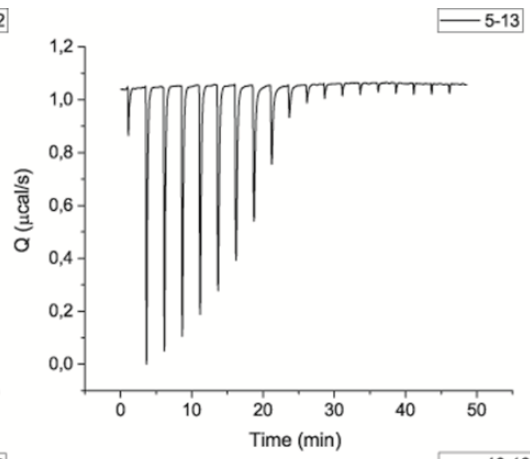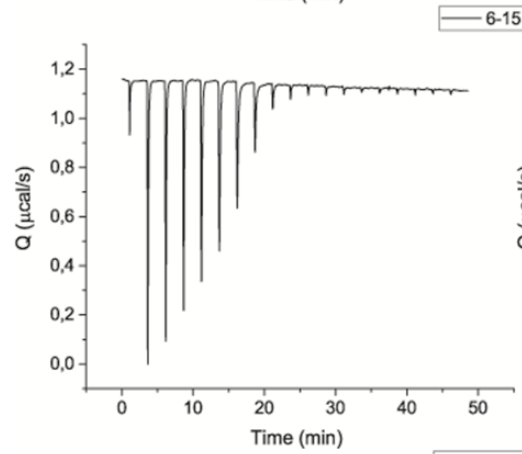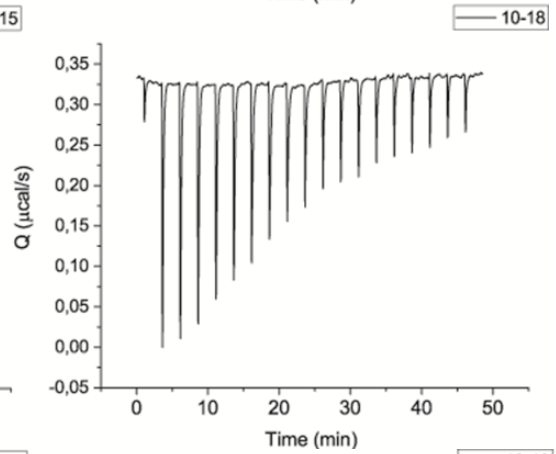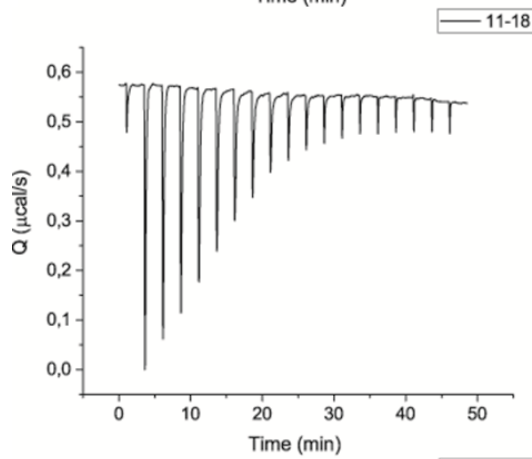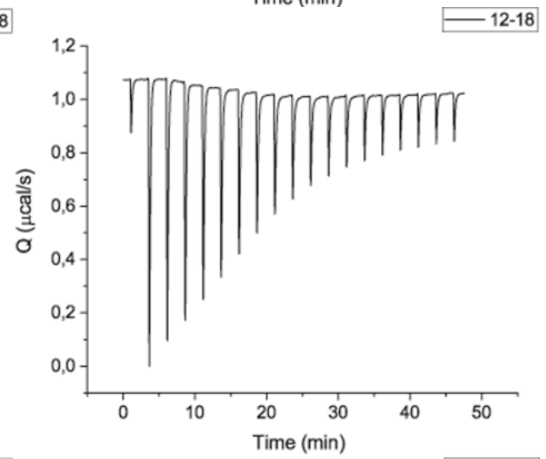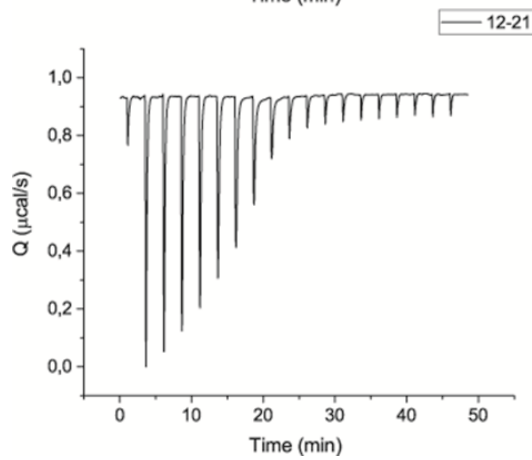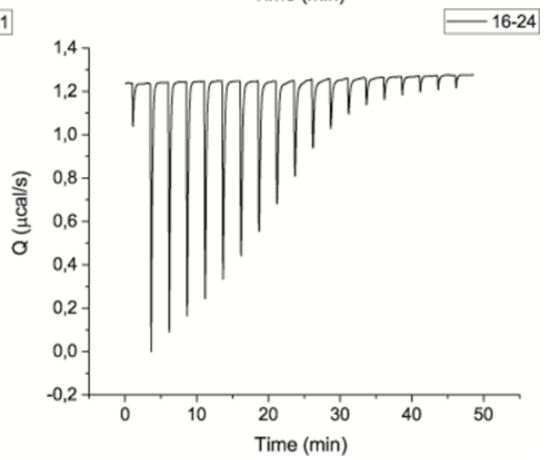

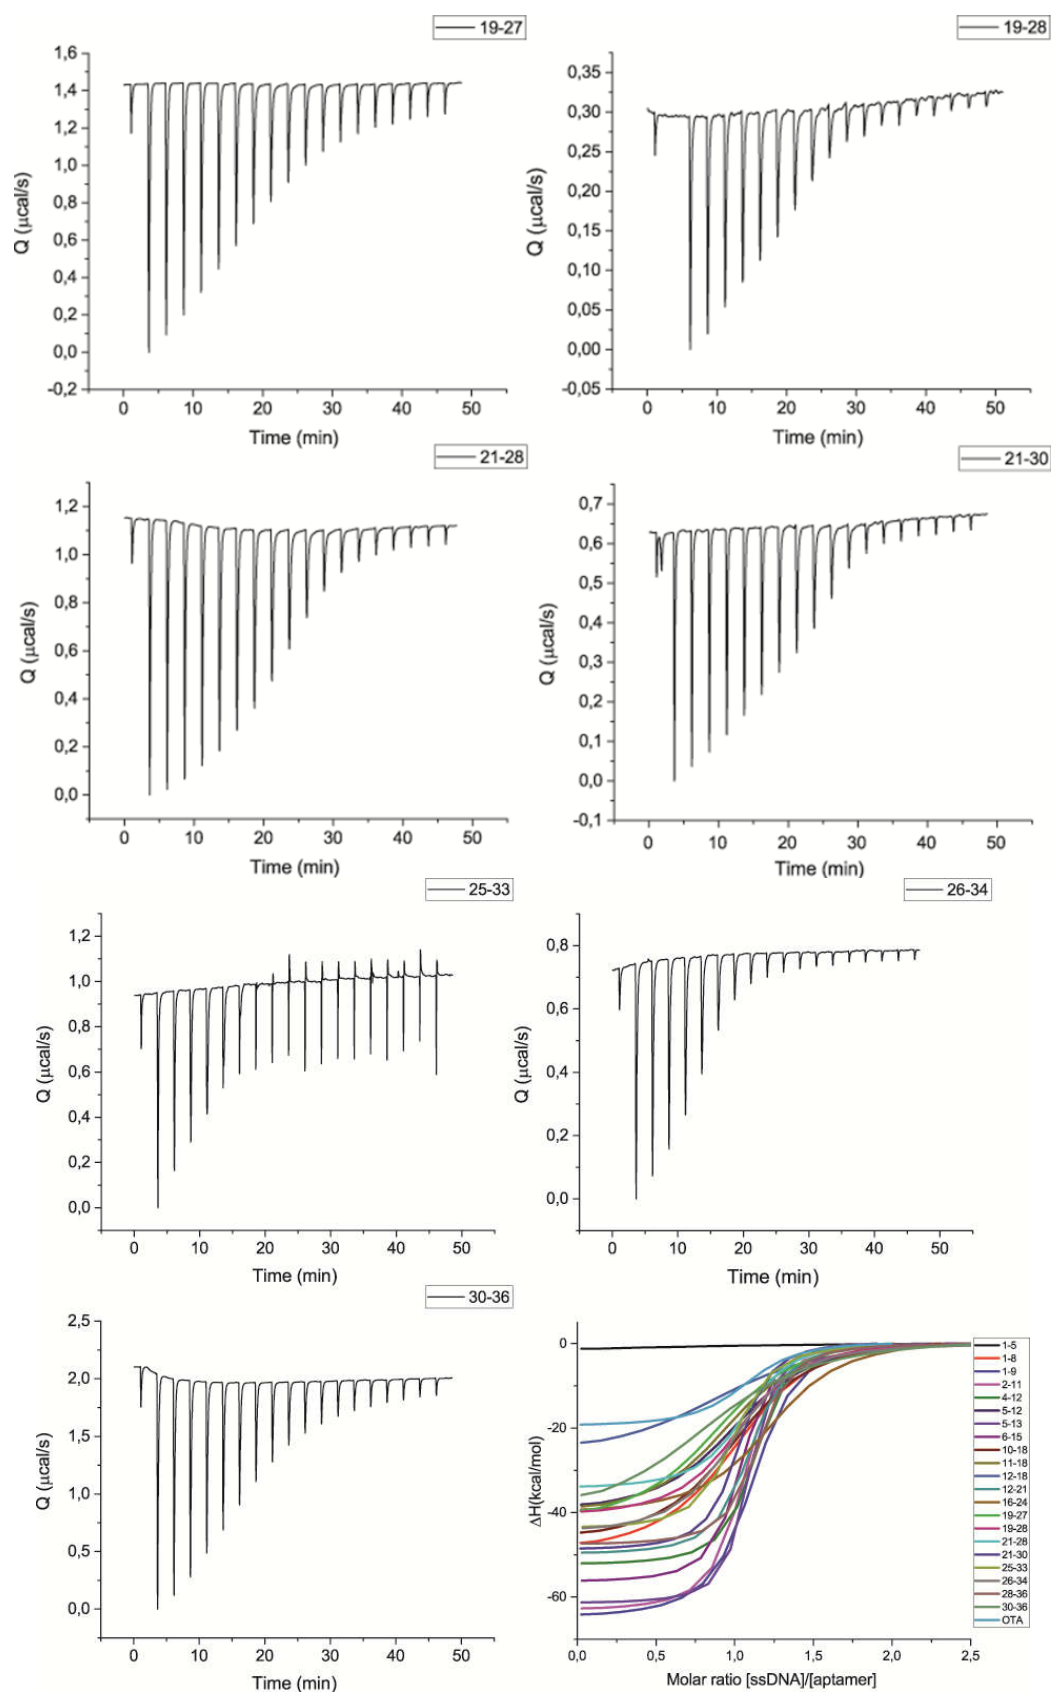

**Figure S2.** ITC measurements for sequential additions of ssDNA to aptamer and the integrated heat plots for all ssDNAs and for OTA.

### S3 Characterization of ssDNAs interaction with aptamer in the presence of labeled OTA by fluorescence anisotropy

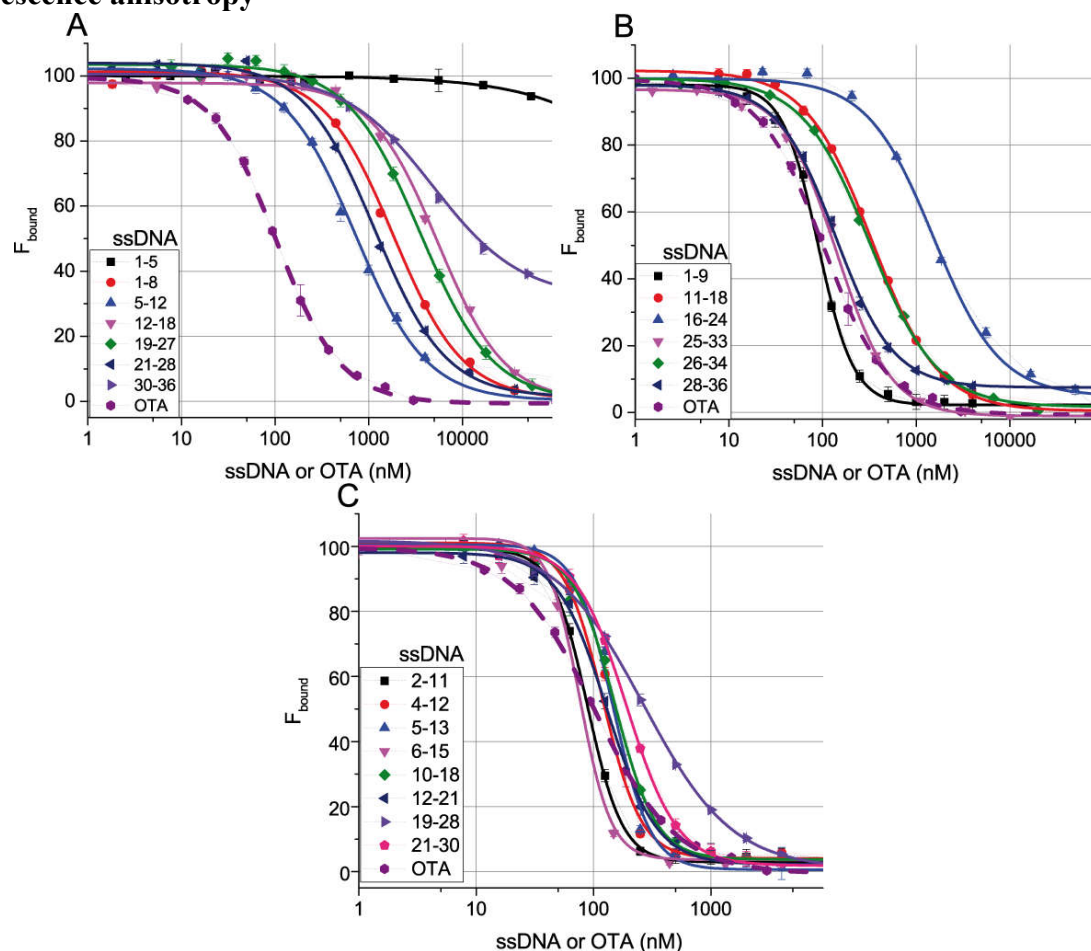

**Figure S3** Dependences of the percentage of bound OTA-Flu from the concentration of ssDNA formed (A) from 13 to 22, (B) from 23 to 24 and (C) from 25 to 27 hydrogen bonds.  $n = 3$

**Table S3.** Additional set of ssDNAs using to clarify the minimum number of H-bonds needed to influence aptamer-OTA interaction

| Binding site | Sequence from 5'to 3' | Purines | Pyrimidines | Length bases | H-bond | $K_I$ (nM) | Time (min.) |
|--------------|-----------------------|---------|-------------|--------------|--------|------------|-------------|
| {18–25}      | ccc tt t ac           | 4       | 4           | 8            | 20     | NB*        | NB*         |
| {24–28}      | gct cc                | 4       | 1           | 5            | 14     | NB*        | NB*         |
| {28–33}      | ccg atg               | 4       | 2           | 6            | 16     | NB*        | NB*         |

NB\* – no binding detected

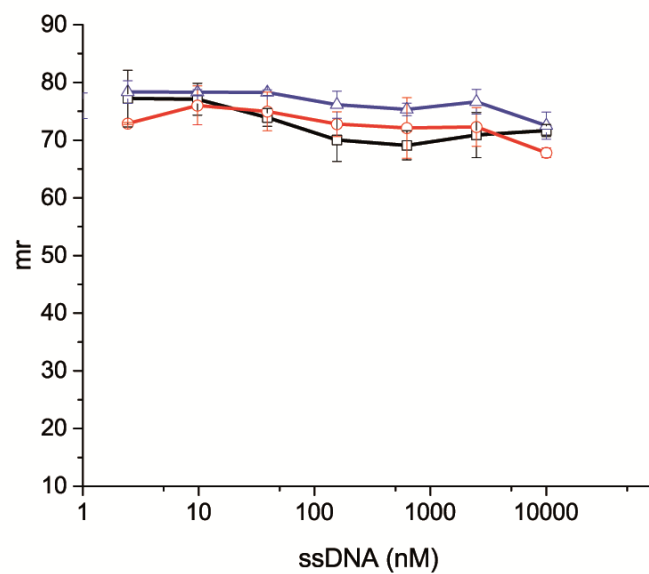

**Figure S4** Dependences of the FA of OTA-Flu from the concentration of ssDNA {24–28} (square), {28–33} (circle) and {18–25} (triangle). n=3

## S4 Characterization of the aptamer and its complexes with ssDNA by CD spectroscopy

### Measurements of circular dichroism time dependences (Method)

Dependences of circular dichroism and absorbance from time were measured simultaneously at 290 nm for complexes aptamer–OTA, aptamer– {6–15}, and aptamer– {6–15} –OTA and at 260 nm for complexes aptamer– {28–36} and aptamer– {28–36} –OTA. Interval between the neighboring points was 5 sec, the measurement time varied from 360 sec to 4200 sec depends on the rate of equilibrium achievement during the complex formation. Measurements were carried out instantly after the injection of second (third, in case aptamer–OTA–ssDNA) component of the interaction without additional mixing. The data of all CD experiments were analyzed using the packaged Pro-Data Chirscan (Applied Photophysics, UK) and processed using the Origin 8.1 (Origin Lab, USA).

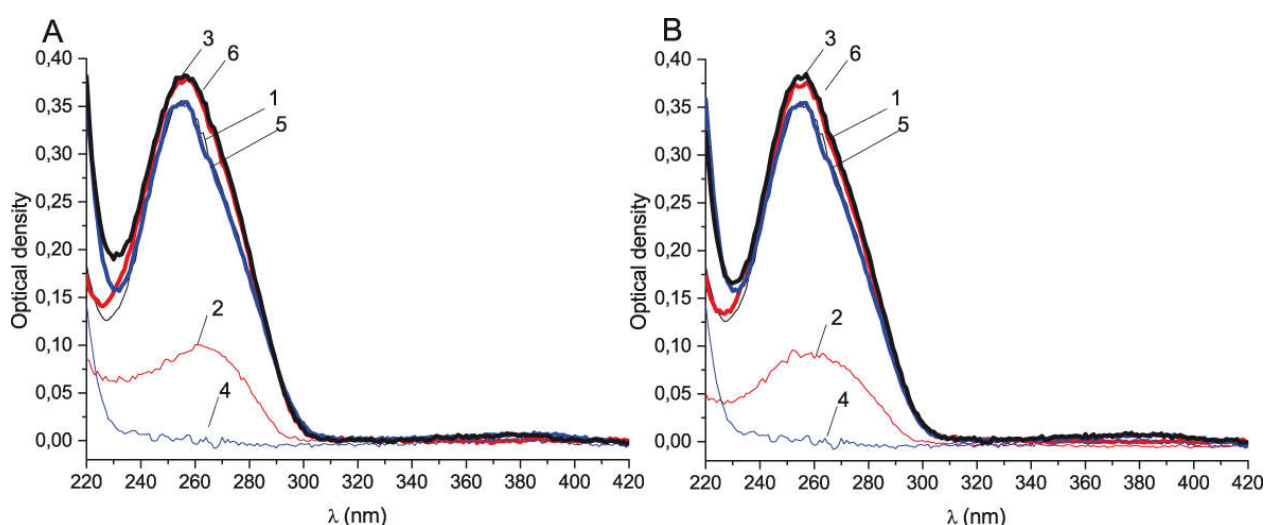

**Figure S5** Absorbance spectra in equilibrium condition measured simultaneously with CD spectra (A) 1 – aptamer, 2 – ssDNA {6–15}, 3 – the aptamer–ssDNA {6–15}, 4 – OTA, 5 – the aptamer–OTA, and 6 – the aptamer–OTA complex after addition of ssDNA {6–15}. (B) 1 – aptamer, 2 – ssDNA {28–36}, 3 – the aptamer–ssDNA {28–36}, 4 – OTA, 5 – the aptamer–OTA, and 6 – the aptamer–OTA complex after addition of ssDNA {28–36}.

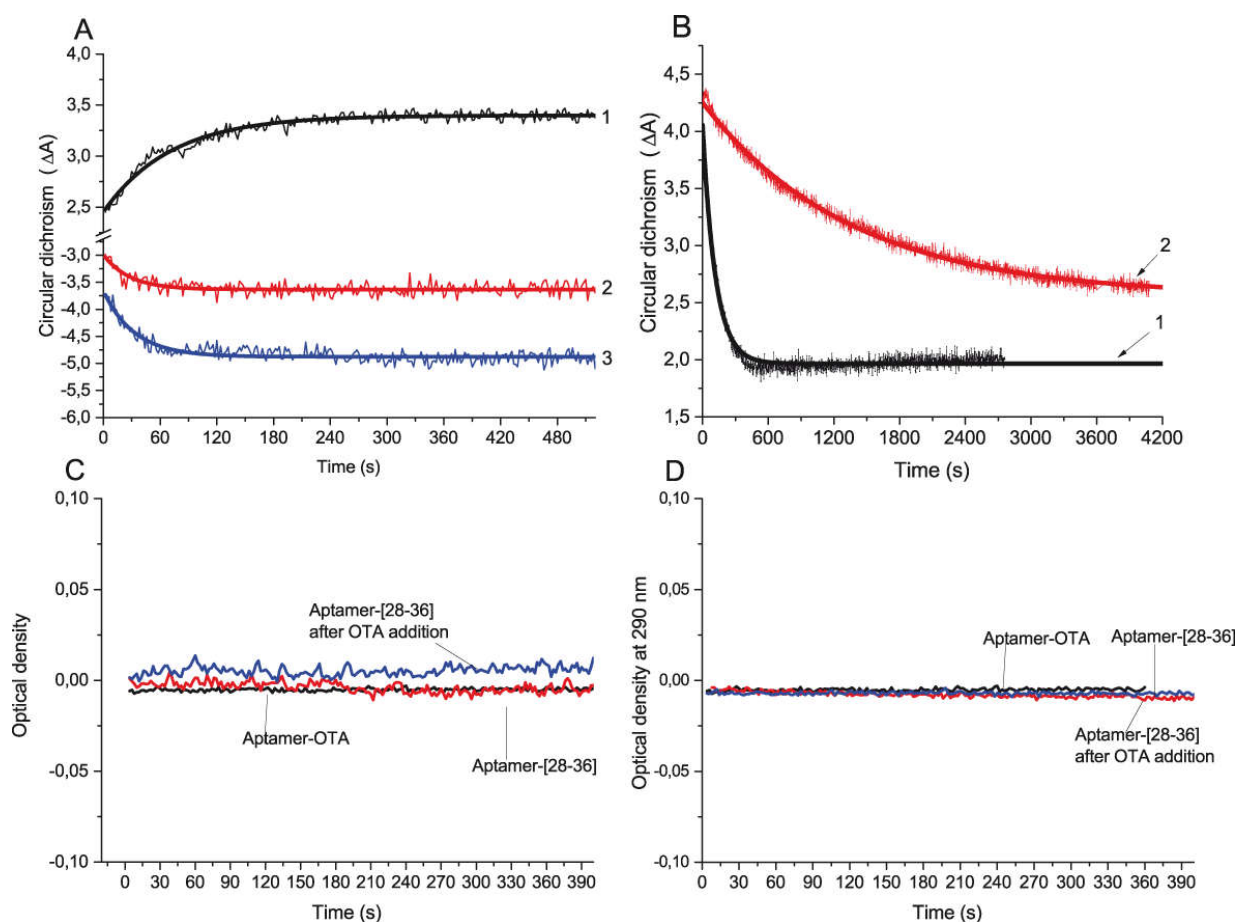

**Figure S6** Time dependences of CD for the complexes: (A) 1 – aptamer-OTA at 290 nm, 2 – aptamer-{28-36} at 260 nm, and 3 – aptamer-{28-36} after addition of OTA at 260 nm; (B) 1 – aptamer- {5-16} at 290 nm and 2 – aptamer-OTA after addition of {5-16} at 290 nm. (C) Time dependences of absorbance for the complexes: aptamer-OTA at 290 nm, aptamer-{28-36} at 260 nm, and aptamer-{28-36} after addition of OTA at 260 nm (D) Time dependences of absorbance for the complexes: aptamer- {5-16} at 290 nm and aptamer-OTA after addition of {5-16} at 290 nm

**Table S4.** Additional CD extrema for the aptamer, OTA, ssDNAs and their complexes\*.

| Sample                             | Concentration (μM) | Extrema wavelength (nm) |              |       |       |
|------------------------------------|--------------------|-------------------------|--------------|-------|-------|
|                                    |                    | «-»                     | «+»          | «-»   | «+»   |
| Aptamer                            | 1                  | - 236                   | 246          | - 261 | 292   |
| OTA*                               | 10                 | - 222                   | - 242        | - 273 | - 372 |
| ssDNA {1-8}                        | 2                  | - 239                   | 274          |       |       |
| Aptamer + ssDNA {1-8}              |                    |                         | 243          | 276   |       |
| Aptamer + ssDNA {1-8} + 1 μM OTA   |                    | - 239                   | 251          | - 255 | 284   |
| Aptamer + ssDNA {1-8} + 10 μM OTA  |                    | - 233                   | 251          | - 260 | 288   |
| ssDNA {1-9}                        | 1                  | - 243                   | 276          |       |       |
| Aptamer + ssDNA {1-9}              |                    | -245                    | 269/278      |       |       |
| Aptamer + ssDNA {1-9} + 1 μM OTA   |                    | - 245                   | 281          |       |       |
| Aptamer + ssDNA {1-9} + 10 μM OTA  |                    | - 231                   | 251/-<br>262 |       | 288   |
| Aptamer + ssDNA {6-15} + 10 μM OTA |                    | - 240                   | 266          |       |       |
| ssDNA {21-28}                      | 1.5                | - 232                   | 277          |       |       |
| Aptamer + ssDNA {21-28}            |                    | - 238                   | 255/-<br>262 |       | 284   |
| Aptamer + ssDNA {21-28}+1 μM OTA   |                    | - 233                   | 248          | - 261 | 287   |
| Aptamer + ssDNA {21-28}+10 μM OTA  |                    | - 229                   | 249          | - 263 | 290   |
| ssDNA {21-30}                      | 1                  | - 248                   | 276          |       |       |
| Aptamer + ssDNA {21-30}            |                    | - 240                   | 284          |       |       |
| Aptamer + ssDNA {21-30}+1 μM OTA   |                    | - 238                   | 248          | - 254 | 288   |
| Aptamer + ssDNA {21-30}+10 μM OTA  |                    | - 232                   | 251          | - 259 | 289   |

\* for OTA all extrema are negative

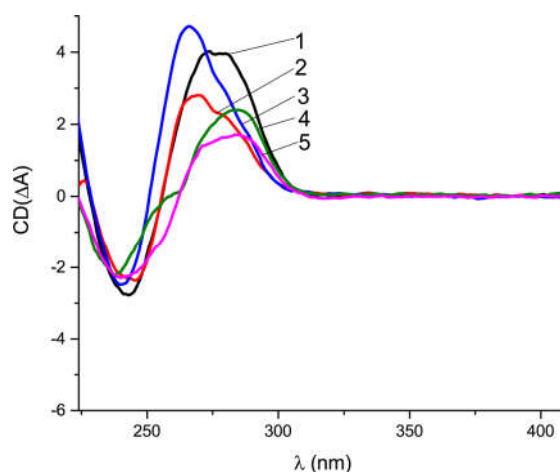**Figure S7** CD spectra of complexes of 1 μM aptamer with (1) 2 μM ssDNA {1-8}, (2) 1 μM ssDNA {1-9}, (3) 1 μM ssDNA {6-15}, (4) 1.5 μM ssDNA {21-28}, and (5) 1 μM ssDNA {21-30}.
